1 Nature Notes: Spatiotemporal variation in the competitive environment, with  
2 implications for how climate change may affect a species with parental care.

3  
4 Ahva L. Potticary<sup>1\*</sup>, Hans W. Otto<sup>2</sup>, Joseph V. McHugh<sup>1</sup>, Allen J. Moore<sup>1</sup>

5  
6 <sup>1</sup>*Department of Entomology, University of Georgia, Athens, Georgia 30606, USA*

7 <sup>2</sup>*Department of Ecology and Evolutionary Biology, University of Arizona, Tucson, Arizona 85721,*  
8 *USA*

9  
10 **\*Corresponding author:**

11 Ahva L. Potticary  
12 Dept. of Entomology  
13 120 Cedar Street  
14 Biological Sciences Building #360  
15 University of Georgia  
16 Athens, GA 30602  
17 +1.406.529.3416  
18 [ahva.potticary@uga.edu](mailto:ahva.potticary@uga.edu)

19  
20 **ORCID identifier:**

21 Ahva L. Potticary: 0000-0002-1157-5315

22 Hans W. Otto:

23 Joseph V. McHugh: 0000-0002-7954-6254

24 Allen J. Moore: 0000-0002-1498-3322

25  
26 **Keywords:** burying beetle, niche partitioning, latitudinal, longitudinal

27  
28 **Figure 1.** Range map.

29 **Table 1.** Necrophilous species captured.

30 **Figure 2.** *N. orbicollis* relative to competition and temperature.

31 **Figure 3.** *Nicrophorus* captures 2002 versus 2022.

32 **Figure 4.** *N. orbicollis* captures across latitudes.

33 **Figure 5.** Pronotum size of Whitehall *Nicrophorus* spp.

34 **Appendix 1.** USDA Soil Survey data for the study area.

35 **Appendix 2.** Trapping dates and raw data for cross-study comparisons.

36

37 **Abstract**

38 Burying beetles of the genus *Nicrophorus* have become a model for studying the evolution of  
39 complex parental care in a laboratory. *Nicrophorus* species depend on small vertebrate carcasses  
40 to breed, which they process and provision to their begging offspring. However, vertebrate  
41 carcasses are highly sought after by a wide variety of species and so competition is expected to be  
42 critical to the evolution of parental care. Despite this, the competitive environment for *Nicrophorus*  
43 is rarely characterized in the wild and remains a missing factor in laboratory studies. Here, we  
44 performed a systematic sampling of *Nicrophorus orbicollis* living near the southern extent of their  
45 range at Whitehall Forest in Clarke County, Georgia, USA. We determined the density of *N.*  
46 *orbicollis* and other necrophilous species that may affect the availability of this breeding resource  
47 through interference or exploitation competition. In addition, we characterize body size, a key trait  
48 involved in competitive ability, for all *Nicrophorus* species at Whitehall Forest throughout the  
49 season. Finally, we compare our findings to other published natural history data for Nicrophorines.  
50 We document a significantly longer active season than was observed twenty years previously at  
51 Whitehall Forest for both *N. orbicollis* and *Nicrophorus tomentosus*, potentially due to climate  
52 change. As expected, the adult body size of *N. orbicollis* was larger than *N. tomentosus*, the only  
53 other *Nicrophorus* species that was captured in 2022 at Whitehall Forest. The other most prevalent  
54 interspecific insects captured included species in the families Staphylinidae, Histeridae,  
55 Scarabaeidae, and Elateridae, which may act as competitors or predators of *Nicrophorus* eggs and  
56 larvae. Together, our results indicate significant variation in intra- and interspecific competition  
57 relative to populations within the *N. orbicollis* range. These findings suggest that the competitive  
58 environment varies extensively over space and time, which help to inform the role of ecology in  
59 the evolution of parental care in this species.

60

## 61 1 INTRODUCTION

62

63 Burying beetles of the genus *Nicrophorus* (Silphidae) have long intrigued evolutionary biologists  
64 due to their complex parental care behavior (Pukowski, 1933; Eggert et al., 1997; Scott, 1998).  
65 Broadly, parental care is expected to evolve to ameliorate harsh environments for offspring  
66 (Wilson, 1975), and variation in parental care can be driven by ecological contexts that change the  
67 costs and benefits of allocating effort to current and future reproductive opportunities (Stearns,  
68 1989; Richardson et al., 2020). The costs and benefits of parental care, and what strategies are  
69 pursued, are determined in part by competition for mates and breeding resources (Richardson et  
70 al., 2020). Moreover, parental care in *Nicrophorus* is known to influence development of offspring  
71 body size, a key trait essential for competition over breeding resources (Otronen, 1988; Hopwood  
72 et al., 2014; Lee et al., 2014; Jarrett et al., 2017). The breeding season of burying beetles can  
73 encompass multiple generations that experience different competitive environments depending on  
74 habitat and when individuals reach adulthood (DeMoss, 1968; Anderson, 1982; Scott et al., 1990;  
75 Eggert & Müller, 1997; Scott, 1998; Meierhofer et al., 1999). Thus, understanding the evolution  
76 of parental care in this system requires an understanding of how competition and ecological  
77 context vary over a breeding season in wild populations.

78 Here, we characterize the competitive environment and traits related to competition in  
79 *Nicrophorus orbicollis* across its breeding season in the southern portion of their range (**Figure 1**).  
80 *Nicrophorus orbicollis*, like all Nicrophorinae, require small vertebrate carcasses to breed, which  
81 are an ephemeral and highly sought-after resource. Body size is a key competitive trait for  
82 *Nicrophorus*, as larger beetles usually win contests for carcasses (Otronen, 1988; Robertson,  
83 1993), and parental care itself has a strong influence on offspring development and adult body size

84 (Hopwood et al., 2014; Jarrett et al., 2017). Parental care in *N. orbicollis* is thought to have evolved  
85 to buffer offspring from competition, predation by scavengers, and decomposition of the carcass  
86 by bacteria and fungi (Eggert & Müller, 1997; Scott, 1998). Once beetles have found a carcass,  
87 they strip the exterior (e.g., fur or feathers), bury, and maintain the carcass with an elaborate  
88 cocktail of secretions that minimize decomposition (Eggert & Müller, 1997; Scott, 1998; Arce et  
89 al., 2012). Following the hatch of larvae, parents then regurgitate pre-digested carrion to their  
90 begging larvae (Pukowski, 1933; Milne et al., 1976).

91 Burying beetle parents actively defend their carcass from intra- and interspecific intruders.  
92 These interactions can be influenced by temperature (Wilson et al., 1984), and parental care itself  
93 may be influenced by temperature (Meierhofer et al., 1999; Benowitz et al., 2019). Temperature  
94 affects both seasonal transitions between overwintering behavior and variation in the competitive  
95 environment. Insect species that use carrion show varying sensitivities to temperature and  
96 humidity, which likely influence the competitive environment (Wilson et al., 1984). *Nicrophorus*  
97 species show temporal niche partitioning during both circadian and seasonal cycles that are likely  
98 supported physiologically by differences in temperature tolerance (Anderson, 1982; Keller et al.,  
99 2019). Moreover, burial and prevention of decomposition may help to prevent discovery of the  
100 carcass by scavengers and competitors (Robertson, 1993; Pagh et al., 2015; Trumbo et al., 2021),  
101 particularly because decomposition is strongly affected by temperature. Outcomes of competition  
102 and population dynamics thus reflect a combination of species presence and their activity levels at  
103 different temperatures. For this reason, we collected temperature, phenological, and competition  
104 data to determine how the competitive environment changes over the breeding season.

105

## 106 **2 MATERIALS AND METHODS**

107

## 108 2.1 Range map and study area

109

110 During the spring – fall of 2022, we conducted a survey of *N. orbicollis* abundance and sympatric  
111 necrophilous insects at Whitehall Forest in Clarke County, Georgia, USA, located in the southern  
112 portion of the *N. orbicollis* range (**Figure 1**; 33.8848° N, 83.3577° W). There are no published  
113 range maps of *N. orbicollis* in the literature; thus, we constructed an approximate range map for  
114 *N. orbicollis* from a GBIF Occurrence Download using verified “research-grade” iNaturalist  
115 (inaturalist.org) observations occurring from 2000 – 2022, downloaded from GBIF.org site on  
116 October 17, 2022 (<https://doi.org/10.15468/dl.dregg3>). Based solely on these data we produced a  
117 map in Adobe® Photoshop (v. 20.0.8; <https://adobe.com>) to show the approximate distribution of  
118 *N. orbicollis*, although it is likely that *N. orbicollis* occupy habitat outside the scope of our range  
119 map. The *N. orbicollis* range was overlaid on a topographic map generated by NASA’s Shuttle  
120 Radar Topography Mission in 2000 (<https://photojournal.jpl.nasa.gov/catalog/PIA03377>) and was  
121 rendered to grayscale in Adobe Photoshop to enable clearer visualization of the range.

122 Whitehall Forest is a discontinuous stretch of forest managed by the University of Georgia  
123 Warnell School of Forestry and covers approximately 840 acres of an “island” of forest surrounded  
124 by residential development in the Southern Outer Piedmont (subregion of the Georgia Piedmont  
125 ecoregion). The forest is comprised primarily of natural pine, planted pine, upland hardwood, and  
126 bottomland hardwood. Within our specific trapping areas, the predominant tree species included  
127 red maple (*Acer rubrum*), American hornbeam (*Carpinus caroliniana*), flowering dogwood  
128 (*Cornus florida*), North American beech (*Fagus grandifolia*), yellow poplar (*Liriodendron*  
129 *tulipifera*), sweetgum (*Liquidambar styraciflua*), shortleaf pine (*Pinus echinata*), southern red oak

130 (*Quercus falcata*), post oak (*Quercus stellata*), and white elm (*Ulmus americana*). Understory was  
131 minimal, and the forest was primarily characterized by large, well-dispersed trees with deep leaf  
132 litter. The study sites are adjacent to habitat including brushy pastures and grassy fields, and much  
133 of Whitehall Forest is interspersed with areas of maintained grassland or areas of intermittent  
134 prescribed burns (**Figure 1 inset**). Based on maps generated from the USDA Soil Survey, soil in  
135 the study area is primarily comprised of sandy clay loam, loamy sandy, and alluvial land (**SI**  
136 **Appendix 1**), similar to other sites supporting *N. orbicollis* (DeMoss, 1968). Humus content was  
137 also high due to a large amount of leaf litter across the entirety of the study site.

138 *Nicrophorus* species require small vertebrate carcasses such as small mammals, reptiles, and  
139 birds to breed. The study area at Whitehall Forest supports approximately ten small mammal  
140 species that may be suitable for *N. orbicollis* reproduction (*pers. comm.* Steven Castleberry). In  
141 addition to small mammals, there are approximately 105 migratory and resident passerine bird  
142 species in the study area that fall within the appropriate weight range used by *N. orbicollis*.  
143 Whitehall Forest is also within the range of multiple species of reptiles that may support *N.*  
144 *orbicollis* breeding, although the species composition is not well known.

145

## 146 2.2 Trapping and life history of *Nicrophorus orbicollis* in Georgia

147

148 Beetles were trapped using hanging Japanese beetle traps (hereafter, traps; item no. 227723, Trécé  
149 Inc., Adair, OK, USA) baited with one-inch square cubes of salmon along three transect lines of  
150 five traps each (**Figure 1 inset**). Traps were hung approximately one meter off the ground in a tree  
151 that shaded the trap. We started trapping on March 1 and defined the onset of the *N. orbicollis*  
152 active season as when the first *N. orbicollis* was captured. We determined the end of the active

153 season as two consecutive trapping events with no *N. orbicollis* captures. One transect was  
154 adjacent to a small pond and perennial stream, while the other two transects did not have permanent  
155 water. *N. orbicollis* is primarily found in woodland areas (Anderson, 1982), therefore, all traps  
156 were placed within woodland habitat. Traps were checked every 6 – 9 days from March 1 to  
157 December 15, except for a few instances where traps could not be checked at this frequency and  
158 the bait was not replaced for 14 days (for a list of the trapping dates, see **Appendix 2**). In traps,  
159 the salmon bait was contained in a small plastic cup that greatly reduced desiccation and insect  
160 scavenger consumption of the bait. For this reason, even though bait was not replaced weekly on  
161 several occasions, it was still present and able to attract beetles, as adults of *Nicrophorus* species  
162 are known to preferentially eat late stage decomposing meat (e.g., Rodriguez et al., 1983;  
163 Dekeirsschieter et al., 2011; von Hoermann et al., 2013). We thus calculated the number of beetles  
164 captured as the number per trap day to account for variation in when traps were checked. We  
165 further noted any teneral beetles (recently eclosed adults that have not yet become fully  
166 melanized), as they provide an indication of recent breeding activity.

167 We visualized the length of the activity period of *N. orbicollis* over the field season with  
168 data from similar studies both temporally within Whitehall Forest, using data collected in the study  
169 area in 2002 (Ulyshen & Hanula, 2003), and spatially, by using data from the central (Kentucky;  
170 DeMoss, 1968) and northern (Ontario; Anderson, 1982) portions of the *N. orbicollis* range. While  
171 all three studies used different trapping methods, e.g., Anderson (1982) used pitfall traps baited  
172 with carrion, their data are roughly comparable to data collected for this study as they both show  
173 seasonal activity of *N. orbicollis*, as well as periods of peak activity. Data were readily available  
174 in a tabular form in DeMoss (1968) but raw data were collected from Figure 8 in Anderson (1982)  
175 and Figure 1 in Ulyshen and Hanula (2003) using the online platform for PlotDigitizer

176 (<https://plotdigitizer.com/>). All three studies collected data weekly, although there were gaps in  
177 the collection times across studies. To allow for visualization across studies that differed in the  
178 date that traps were checked, we assigned a single date to trap dates that were most closely aligned  
179 (i.e., three or fewer days). To account for gaps in data collection at Whitehall Forest relative to  
180 other sites, we summed the number of beetles collected at other sites over the same time periods  
181 when traps in Georgia were not checked. See **Appendix 2** for details of total captures per study-  
182 specific trap date.

183

### 184 2.3 Characterization of the competitive environment

185

186 We characterized the competitive environment for *N. orbicollis* by identifying all species of insects  
187 attracted to carrion in traps. Furthermore, we identified all individuals captured to genus and to  
188 species, if possible (**Table 1**), apart from those that appeared two or fewer times, as these likely  
189 reflect incidental bycatch. A type specimen of each species was collected and pinned. We  
190 measured pronotum length of all *Nicrophorus* captured to the nearest 0.01 mm using digital  
191 calipers and identified the sex of each beetle. A small subset of the *N. orbicollis* captured were  
192 retained (n = 144) to augment our laboratory population. Beetles sometimes escaped after sexing  
193 but prior to measurement (N = 3) or were too damaged or desiccated, in which case, they were  
194 identified to species but no sex or pronotum length data were collected (N = 77). Since burying  
195 beetles can travel long distances to find carrion, e.g., *Nicrophorus americanus* can travel 7.24 km  
196 in a single night (Jurzenski et al., 2011), the retention of a small number of individuals is unlikely  
197 to significantly impact local populations or results of trapping efforts. We did not retain more than  
198 10 individuals in a week as precaution. Also, it is likely that some individuals were recaptured.



199 Despite this, our capture methods were intended to demonstrate the number of individuals  
200 competing for carrion at any given time rather than provide total numbers of individuals in the  
201 study site and are thus still appropriate and representative of changes in the competitive  
202 environment.

203 We collected ambient temperature and precipitation data from the University of Georgia  
204 Weather Network (College of Agricultural and Environmental Sciences, University of Georgia),  
205 using the Watkinsville-HORT Weather Station, located 5.15 km from the nearest trapping location.  
206 *N. orbicollis* are known to survive overwintering at soil depths between 5 cm – 105 cm in more  
207 northern portions of their range (Hoback et al., 2015). For this reason, we placed ThermoChron®  
208 iButton temperature loggers (©Maxim Integrated Products, Inc., San Jose, CA) approximately 10-  
209 12 cm underground at the start of each transect line in October to determine the soil temperature  
210 associated with *Nicrophorus* diapause in our study area.

211

## 212 2.4 Statistical analyses

213

214 We performed all statistical analyses using JMP Pro (v. 16.0.0, <http://jmp.com>) and produced  
215 figures in SigmaPlot (v. 14.5, <http://www.sigmaplot.co.uk>). Results are means  $\pm$  SE unless  
216 otherwise noted. We analyzed pronotum length of individuals by sex and by species using pooled  
217 t-tests and two-way ANOVA with sex and species as factors.

218

## 219 3 RESULTS

220

### 221 3.1 Life history of *N. orbicollis* in Georgia

222

223 We observed the first *N. orbicollis* activity in traps on 24 March (1 adult male, 1 adult female;  
224 **Figure 2a**), and captured the last *N. orbicollis* on November 16, roughly corresponding to when  
225 soil temperatures 12 cm underground fell below 14°C (**Figure 2c**). We captured four teneral *N.*  
226 *orbicollis* adults on 28 June. Developmental periods for *N. orbicollis* in the laboratory are  
227 approximately 45 days from egg to adult (Potticary et al., in review). Thus, these data suggest that  
228 the parents of these individuals laid eggs between mid- to late-May.

229 We observed an extension in the active season of *Nicrophorus* species in Whitehall Forest  
230 relative to research conducted in the same area in 2002 (**Figure 3**). *Nicrophorus orbicollis* emerged  
231 two weeks earlier and entered diapause nearly a week later, an approximately three-week extension  
232 of the active season over twenty years (**Figure 3a**). We observed a similar pattern in *N. tomentosus*,  
233 which emerged a week earlier and entered diapause two weeks later than in 2002 (**Figure 3b**).  
234 Across latitudes, *N. orbicollis* in more northern populations emerge later and enter diapause sooner  
235 than in Georgia, showing higher and more condensed bursts of activity (**Figure 4**). Together, these  
236 data support the idea that the length of the *N. orbicollis* active season tracks temperature both  
237 within and across populations.

238

### 239 3.2 Characterization of the inter- and intraspecific competitive environment

240

241 A total of 703 *N. orbicollis* were captured over the season, with the number of females (N = 373)  
242 exceeding the numbers of males (N = 253; **Table 1**). A similar pattern was observed with *N.*  
243 *tomentosus*; a total of 53 of *N. tomentosus* were captured over the active season, with the number  
244 of females (N = 38) exceeding the number of males (N = 15). The most common interspecific

245 species captured in carrion traps were *Necrophila americana*, *Oiceoptoma inaequale*, and  
246 Histeridae spp., although multiple potentially necrophilous species were captured (**Table 1**). The  
247 number of individuals of each species captured appears to coincide with a decrease in *N. orbicollis*  
248 captures and warmer ambient temperatures (**Figure 2b**). Peak periods of *N. tomentosus* captures  
249 appear to be disjunct from peak periods of *N. orbicollis* captures (**Figure 3**). The active season of  
250 *N. orbicollis* appears to be influenced on latitude, likely due to differences in temperature, with  
251 more northerly populations having a shorter active season than those farther south (**Figure 4**).

252 Pronotum length differed between *Nicrophorus* species and between the sexes in *N.*  
253 *tomentosus* (**Figure 5**). *N. orbicollis* was larger than *N. tomentosus* ( $F_{1,673} = 62.083$ ,  $P < 0.0001$ ),  
254 and there was an effect of sex on pronotum size ( $F_{1,673} = 5.240$ ,  $P = 0.0224$ ), but there was no  
255 interaction between sex and species on pronotum size ( $F_{1,673} = 2.873$ ,  $P = 0.091$ ). Pronotum length  
256 of female *N. orbicollis* ranged from 3.69 - 6.9 mm (mean  $5.43 \pm 0.03$  mm,  $N = 371$ ), while  
257 pronotum length of male *N. orbicollis* ranged from 3.65 - 6.73 mm (mean  $5.37 \pm 0.04$  mm,  $N =$   
258 252). There was no statistical difference in the pronotum length of female versus male *N. orbicollis*  
259 ( $t_{1,621} = -1.1478$ ,  $P = 0.252$ ). Pronotum length of *N. tomentosus* females range from 3.4 - 5.96 mm  
260 (mean  $4.83 \pm 0.09$  mm,  $N = 37$ ), and male *N. tomentosus* body size ranged from 3.8 - 5.3 mm  
261 (mean  $4.45 \pm 0.15$  mm,  $N = 15$ ). On average, female *N. tomentosus* were larger than male *N.*  
262 *tomentosus* ( $t_{1,50} = -2.19$ ,  $P = 0.030$ ) but there was a large discrepancy in the sample size between  
263 males and females.

264

## 265 4 DISCUSSION

266

267 We characterized the competitive environment across the active season for *N. orbicollis* breeding  
268 in a population located in southern portion of their range and compared these results to similar  
269 studies conducted at different temporal and spatial locations across their range. Of particular  
270 interest, we document that *Nicrophorus* species currently emerge earlier and enter diapause later  
271 in Whitehall Forest than 20 years ago (**Figure 3**). While this only constitutes two sampling periods,  
272 a difference of nearly three weeks (or about  $\frac{1}{2}$  the length of time to develop from egg to adult) in  
273 the length of the active season for two different species may indicate that climate change is  
274 impacting *Nicrophorus* activity, as warming temperatures have been indicated for Georgia  
275 (Frankson et al., 2022).

276 Insect diapause activity can be driven by photoperiod, density, and other factors (reviewed  
277 in Gill et al., 2017); however, *Nicrophorus* termination of diapause is likely driven by soil  
278 temperature as the beetles are thought to burrow to avoid winter temperatures and are thus unlikely  
279 to have access to other cues such as photoperiod (Hoback & Conley, 2015). Moreover, given the  
280 broad range for *N. orbicollis* (**Figure 1**), the most parsimonious explanation is that diapause  
281 activity is determined by local temperature cues (**Figure 4**). This may make *Nicrophorus* species  
282 particularly susceptible to changing temperatures resulting from climate change. The mechanisms  
283 that govern the duration of diapause and activity periods in *N. orbicollis* are poorly understood and  
284 warrant future research, and long-term data are particularly needed.

285 We found evidence indicating that *N. orbicollis* breeds as early as May at Whitehall Forest.  
286 Several teneral adults were observed on 28 June and given the approximately 45-day egg-to-adult  
287 developmental times in this species, this indicates an onset of breeding time between mid-May to  
288 late-May. Anderson (1982) used more in-depth methods to characterize tenerals in Ontario where  
289 they were not detected until August and September. A spike of young adults this close to the end

290 of the breeding season (concluding in late September), may indicate that in more northern  
291 populations there is only a single generation per active season. An earlier onset of breeding in  
292 Whitehall Forest, in conjunction with delayed diapause relative to other portions of the range  
293 (Figure 4; DeMoss, 1968; Anderson, 1982), indicate that populations in Georgia may have  
294 multiple generations within a single season. Future research should investigate whether the  
295 expression of parental care varies in populations with single versus multiple generations per  
296 season.

297         The total number of *N. orbicollis* captured in this study was over double the number of  
298 individuals captured in Whitehall Forest in 2002, while there was nearly a 2/3 decrease in the  
299 number of *N. tomentosus* captured in 2022 relative to 2002 (Figure 3; Ulyshen & Hanula, 2003).  
300 While there are methodological differences between these studies – e.g., Ulyshen and Hanula  
301 (2003) killed and collected all individuals and baited traps with chicken – there are several lines  
302 of evidence suggesting that these differences reflect increases in *N. orbicollis* density. First, there  
303 is no evidence suggesting that either burying beetle species prefers chicken to salmon, or that the  
304 number of traps affected capture success, as similar numbers of *N. orbicollis* were captured for the  
305 last half of our field seasons (**Figure 3**). Second, our laboratory maintained the same trap lines in  
306 2021 and collected 630 *N. orbicollis* to establish a laboratory colony, which also surpasses  
307 numbers captured in 2002. The significant decrease in the number of *N. tomentosus* documented  
308 between the two studies may also indirectly support that *N. orbicollis* populations are increasing.  
309 *N. tomentosus* are generally competitively subordinate to *N. orbicollis* (Schrempf et al., 2021),  
310 such that there is temporal niche partitioning between periods of activity of *N. orbicollis* and *N.*  
311 *tomentosus* (Anderson, 1982; Wilson et al., 1984; Keller et al., 2019). In accordance with previous  
312 research, we also found that *N. tomentosus* are more abundant in traps when *N. orbicollis* captures

313 are low. An increase in *N. orbicollis* populations could provide one possible explanation for the  
314 drastic decrease in *N. tomentosus* at our study site. We suggest it would be valuable to use mark-  
315 recapture methods to derive estimates of population-level change over time in future research.

316 We captured more females than males of both *Nicrophorus* species. Across *Nicrophorus*  
317 species, some studies have documented roughly equal sex ratios in the wild (Milne & Milne, 1976;  
318 Anderson, 1982; Otronen, 1988), while others have also noted higher captures rates of females  
319 than males (Conley, 1982; Trumbo, 1990; Sikes, 1996). However, this is not necessarily indicative  
320 of differences in secondary sex ratios. Variation in captures may reflect differences in attraction to  
321 different types of carrion, such as state of decomposition, size, and species of carrion, as this may  
322 attract beetles at different reproductive stages (Wilson & Knollenberg, 1984; Otronen, 1988;  
323 Delclos et al., 2021). Males may not be as attracted to carcasses as females as they can “call” for  
324 females off a carcass and so males may split their time between searching for carcasses and calling  
325 for females (Müller et al., 1987; Eggert & Müller, 1997; Beeler et al., 1999). Moreover, our  
326 laboratory colony is derived from beetles at Whitehall Forest, and sex ratios of beetles that survive  
327 to adulthood are almost exactly 1:1 (Potticary et al., in review). This provides indirect evidence  
328 that the discrepancy in captures between the sexes may reflect behavioral differences in response  
329 to variation in carrion, although future research would be needed to address this effect.

330 *Nicrophorus orbicollis* densities were highest in late April – late May, and mid-June to  
331 early August (**Figure 3**). On a short timescale, the number of *Nicrophorus* that we captured reflect  
332 a combination of total individuals, temperature, food, and how many individuals are underground  
333 breeding and thus not searching for food. On an evolutionary timescale, we would expect peak  
334 *Nicrophorus* abundance to reflect an evolved response to ideal breeding conditions. In Georgia,  
335 April and May were periods of peak *N. orbicollis* capture, which correspond roughly to avian

336 breeding in Whitehall Forest, and across latitudes, patterns are similar (**Figure 4**). *Nicrophorus*  
337 *orbicollis* depends on carcasses, which means that vertebrates dying of predation are unlikely to  
338 be available for breeding. Nestling and fledgling mortality of avian species due to exposure is high,  
339 and adults deposit dead nestlings away from the nest, which may provide a predictable source of  
340 carcasses for burying beetles. In addition, small mammal species are often plentiful in spring and  
341 early summer in North America (Merritt, 2010), and even though a reliable measure of mortality  
342 is difficult to obtain in some species, non-predator related mortality (e.g., food limitation, habitat  
343 conditions, disease) in larger populations could yield more carcass availability in spring. Together,  
344 these may provide a predictable source of breeding resources during certain months. Moreover, *N.*  
345 *orbicollis* captures in traps decreased in June, which would be consistent with beetles breeding on  
346 carcasses rather than searching for food (**Figure 2**). It is also intriguing that *N. tomentosus* is more  
347 cold tolerant and avoids *N. orbicollis*, yet *N. tomentosus* does not emerge from diapause until May  
348 despite low *N. orbicollis* numbers in March and early April. This may reflect that environmental  
349 conditions are too poor for successful breeding early in the season. However, future research is  
350 needed to determine the factors that influence peak activity periods across the *N. orbicollis* range.

351 While *Nicrophorus* are often expected to be the only species that compete via interference  
352 competition for breeding carcasses, we documented multiple species that may reduce the  
353 availability of carcasses through exploitation competition or that may be able to outcompete  
354 *Nicrophorus* due to larger body size. The most common inter-specific competitors captured, in  
355 order of abundance, included *Necrophila americana*, *Oiceoptoma inequale*, *N. tomentosus*,  
356 *Deltachilum gibbosum*, and *Oiceoptoma noveboracense* (**Table 1**). Some of these species are  
357 common across the range of *N. orbicollis*, albeit at different densities. For example, by-catch of  
358 research in Ontario found that the most common co-occurring species were *O. noveboracense*, *O.*

359 *inequale*, and *N. americana* (Anderson, 1982). Intriguingly, previous work at Whitehall Forest  
360 recorded multiple species that were not captured or were only caught once in 2022, including *N.*  
361 *marginatus*, *N. pustulatus*, and *Necrodes surinamensis*. It is important to note that different  
362 trapping methods were used by Ulnysha and Hanula (2003) and *N. marginatus* and *N. pustulatus*  
363 were captured at low densities in 2002. Yet, these differences are unlikely to reflect a difference  
364 in trapping mode, as all three of these species were captured using similar trapping methods in  
365 Virginia (unpub. data). The absence of *N. surinamensis* is particularly stark, as this species was  
366 relatively common in 2002 and it was only captured a single time in 2022 in late November. It is  
367 possible that changes in species composition reflect stochasticity in sampling or, alternatively, that  
368 these differences reflect long-term changes in community composition due to other factors, like  
369 climate change. Climate change has been linked to changes in biological interactions that impact  
370 species composition across a diversity of systems (Dijkstra et al., 2011; Czortek et al., 2018). Our  
371 documentation of both an extended active season for two species of *Nicrophorus* species and  
372 density changes over the past twenty years at Whitehall may indicate effects of climate change.

373         We captured multiple species for which was unclear whether they were acting as  
374 competitors or predators of larvae on carcasses, including several species of the beetle families  
375 Elateridae and Histeridae (**Table 1**). Histerid beetles were one of the most abundant groups that  
376 we captured, although only one specimen was identified to genus (*Euspilota* sp.). Many histerid  
377 species are generalist predators that are known to prey upon small arthropods, including the  
378 immature and adult stages of other insects, and some histerid species are necrophilous (Correa et  
379 al., 2020). Histerid species are found worldwide and an estimated 6% are associated with carrion  
380 (Correa et al., 2020). Histeridae species have been captured in conjunction with *Nicrophorus*  
381 species in this study and other ecological studies all over the world (Shubeck, 1983; Naranjo-



382 López et al., 2011; Psarev et al., 2020). Indeed, Naranjo-López and Navarrete-Heredia (2011)  
383 found that Histeridae species were one of the most abundant groups captured with *Nicrophorus*  
384 *olidus* in Mexico. Despite the widespread overlap of Histeridae and *Nicrophorus* species, there is  
385 little known about how hister beetles may impact breeding *Nicrophorus*. The threat of predation  
386 to offspring is expected to be a major factor in the evolution of parental care in insects like burying  
387 beetles (Tallamy, 1984; Scott, 1990, 1998; Suzuki et al., 2006; Trumbo, 2022), and thus  
388 widespread predators should be of importance for behavioral evolution across *Nicrophorus*. It is  
389 intriguing that the peak of hister beetle activity in this study corresponded to periods when breeding  
390 *N. orbicollis* likely had larvae on carcasses (early June to early July; **Figure 2**). Future research  
391 should investigate the relationship between *Nicrophorus* and associated histerid and elaterid  
392 species and examine any potential impacts on *Nicrophorus* parental care strategies.

393 In conclusion, we documented extreme variation in the competitive environment  
394 experienced by *N. orbicollis* over space and time. Behavior is a response to a context, and parental  
395 care strategies are expected to be particularly influenced by competition in burying beetle species.  
396 Thus, an individual burying beetle's experience depends on when they are an adult and the  
397 population context of their natal population (Meierhofer et al., 1999). In this study, we document  
398 changes in both the length of the active season and the species composition of Whitehall Forest  
399 which may be influenced by climate change. Future behavioral and ecological research to better  
400 understand breeding strategies, activity, distribution, and effects of climate change on *N. orbicollis*  
401 is warranted.

402

403 **Acknowledgements**

404

405 We would like to thank Kathryn Kollars for the beetle art used in this study. We would also like  
406 to thank Kathryn Kollars, Lance Fountain, and Emily Shelby for field assistance and help with  
407 preparation of insect collection. We would also like to thank Steven Castleberry and the  
408 mammalogy class at University of Georgia for providing the list of known small mammal species  
409 from within the study area. Lastly, we are indebted to the Warnell School of Ecology for allowing  
410 us to conduct this research at Whitehall Forest. ALP, AJM, and HWO conceived of study and  
411 developed methods. ALP and HWO collected data. ALP created figures. ALP, HWO, and JVM  
412 identified captured species. ALP, HWO, JVM, and AJM all contributed to editing and writing the  
413 manuscript. ALP was funded by a USDA cooperative agreement to AJM.

414

## 415 5 REFERENCES

416

- 417 Anderson, R. S. (1982). Resource partitioning in the carrion beetle (Coleoptera:Silphidae) fauna  
418 of southern Ontario: ecological and evolutionary considerations. *Canadian Journal of*  
419 *Zoology*, 60(6), 1314-1325. doi:<https://doi.org/10.1139/z82-178>
- 420 Arce, A. N., Johnston, P. R., Smiseth, P. T., & Rozen, D. E. (2012). Mechanisms and fitness  
421 effects of antibacterial defences in a carrion beetle. *Journal of Evolutionary Biology*,  
422 25(5), 930-937. doi:<https://doi.org/10.1111/j.1420-9101.2012.02486.x>
- 423 Beeler, A. E., Rauter, C. M., & Moore, A. J. (1999). Pheromonally mediated mate attraction by  
424 males of the burying beetle *Nicrophorus orbicollis*: alternative calling tactics conditional  
425 on both intrinsic and extrinsic factors. *Behavioral Ecology*, 10(5), 578-584.  
426 doi:<https://doi.org/10.1093/beheco/10.5.578>

- 427 Benowitz, K. M., Amukamara, A. U., Mckinney, E. C., & Moore, A. J. (2019). Development and  
428 the effects of extended parenting in the cold-breeding burying beetle *Nicrophorus sayi*.  
429 *Ecological Entomology*, 44(1), 11-16. doi:<https://doi.org/10.1111/een.12670>
- 430 Conley, M. R. (1982). Carrion locating efficiency in burying beetles, *Nicrophorus carolinus* (L.)  
431 (Silphidae). *The Southwestern Naturalist*, 27(1), 11-15.  
432 doi:<https://doi.org/10.2307/3671401>
- 433 Correa, R. C., Leivas, F. W., Moura, D. P., & Almeida, L. M. (2020). Necrophilous Histeridae  
434 (Insecta: Coleoptera): what do we know after 200 years? *The Coleopterists Bulletin*,  
435 74(2), 375-383. doi:<https://doi.org/10.1649/0010-065X-74.2.375>
- 436 Czortek, P., Kapfer, J., Delimat, A., Eycott, A. E., Grytnes, J.-A., Orczewska, A., . . .  
437 Jaroszewicz, B. (2018). Plant species composition shifts in the Tatra Mts as a response to  
438 environmental change: a resurvey study after 90 years. *Folia Geobotanica*, 53(3), 333-  
439 348. doi:10.1007/s12224-018-9312-9
- 440 Dekeirsschieter, J., Verheggen, F. J., Haubruge, E., & Brostaux, Y. (2011). Carrion beetles  
441 visiting pig carcasses during early spring in urban, forest and agricultural biotopes of  
442 Western Europe. *Journal of Insect Science*, 11, 73. doi:10.1673/031.011.7301
- 443 Delclos, P. J., Bouldin, T. L., & Tomberlin, J. K. (2021). Olfactory choice for decomposition  
444 stage in the burying beetle *Nicrophorus vespilloides*: preference or aversion? *Insects*,  
445 12(1), 11. doi:<https://doi.org/10.3390/insects12010011>
- 446 DeMoss, G. L. (1968). Ecological factors controlling population distribution of the burying  
447 beetle, *Nicrophorus orbicollis*. *Morehead State Theses and Dissertations*, 615.  
448 doi:[https://scholarworks.moreheadstate.edu/msu\\_theses\\_dissertations/615](https://scholarworks.moreheadstate.edu/msu_theses_dissertations/615)

- 449 Dijkstra, J. A., Westerman, E. L., & Harris, L. G. (2011). The effects of climate change on  
450 species composition, succession and phenology: a case study. *Global Change Biology*,  
451 *17*(7), 2360-2369. doi: <https://doi.org/10.1111/j.1365-2486.2010.02371.x>
- 452 Eggert, A.-K., & Müller, J. K. (1997). Biparental care and social evolution in burying beetles:  
453 lessons from the larder. In J. C. Choe & B. J. Crespi (Eds.), *The evolution of social*  
454 *behaviour in insects and arachnids* (pp. 216). Cambridge: Cambridge University Press.
- 455 Frankson, R., Kunkel, K., Stevens, L., Stewart, B., Sweet, W., Murphey, B., & Rayne, S. (2022).  
456 Georgia State Climate Summary 2022. NOAA Technical Report NESDIS 150-GA.  
457 *NOAA/NESDIS*.
- 458 Gill, H. K., Goyal, G., & Chahil, G. (2017). Insect diapause: a review. *Journal of Agricultural*  
459 *Science and Technology*, *7*, 454-473. doi:10.17265/2161-6256/2017.07.002
- 460 Hoback, W. W., & Conley, A. (2015). *Overwintering biology and tests of trap and relocate as a*  
461 *conservation measure for burying beetles*. Retrieved from  
462 <https://rosap.nrl.bts.gov/view/dot/28823>
- 463 Hopwood, P. E., Moore, A. J., & Royle, N. J. (2014). Effects of resource variation during early  
464 life and adult social environment on contest outcomes in burying beetles: a context-  
465 dependent silver spoon strategy? *Proceedings of the Royal Society B: Biological*  
466 *Sciences*, *281*(1785), 20133102. doi:10.1098/rspb.2013.3102
- 467 Jarrett, B. J. M., Schrader, M., Rebar, D., Houslay, T. M., & Kilner, R. M. (2017). Cooperative  
468 interactions within the family enhance the capacity for evolutionary change in body size.  
469 *Nature Ecology and Evolution*, *1*(7). doi:<https://doi.org/10.1038/s41559-017-0178>
- 470 Jurzenski, J., Snethen, D. G., Brust, M. L., & Hoback, W. W. (2011). New records of carrion  
471 beetles in Nebraska reveal increased presence of the American burying beetle,

- 472 *Nicrophorus americanus* Olivier (Coleoptera:Silphidae) *Great Plains Research*, 21(2),  
473 131-143.
- 474 Keller, M. L., Howard, D. R., & Hall, C. L. (2019). Spatiotemporal niche partitioning in a  
475 specious silphid community (Coleoptera: Silphidae *Nicrophorus*). *The Science of Nature*,  
476 106(11), 57. doi:10.1007/s00114-019-1653-6
- 477 Lee, V. E., Head, M. L., Carter, M. J., & Royle, N. J. (2014). Effects of age and experience on  
478 contest behavior in the burying beetle, *Nicrophorus vespilloides*. *Behavioral Ecology*  
479 25(1), 172-179. doi:10.1093/beheco/art101
- 480 Meierhofer, I., Schwarz, H. H., & Müller, J. K. (1999). Seasonal variation in parental care,  
481 offspring development, and reproductive success in the burying beetle, *Nicrophorus*  
482 *vespillo*. *Ecological Entomology*, 24(1), 73-79. doi:[https://doi.org/10.1046/j.1365-](https://doi.org/10.1046/j.1365-2311.1999.00172.x)  
483 [2311.1999.00172.x](https://doi.org/10.1046/j.1365-2311.1999.00172.x)
- 484 Merritt, J. F. (2010). *The biology of small mammals*. Baltimore, Maryland: John Hopkins  
485 University Press.
- 486 Milne, L. J., & Milne, M. (1976). The social behavior of burying beetles. *Scientific American*,  
487 235(2), 84-89. doi:<https://doi.org/10.1038/scientificamerican0876-84>
- 488 Müller, J. K., & Eggert, A. K. (1987). Effects of carrion-independent pheromone emission by  
489 male burying beetles (Silphidae: *Nicrophorus*). *Ethology*, 76(4), 297-304.  
490 doi:<https://doi.org/10.1111/j.1439-0310.1987.tb00690.x>
- 491 Naranjo-López, A. G., & Navarrete-Heredia, J. L. (2011). Coleópteros necrócolos (Histeridae,  
492 Silphidae y Scarabaeidae) en dos localidades de Gómez Farías, Jalisco, México. *Revista*  
493 *Colombiana de Entomología*, 37(1), 103-110.  
494 doi:<https://doi.org/10.25100/socolen.v37i1.9051>

- 495 Otronen, M. (1988). The effect of body size on the outcome of fights in burying beetles  
496 (*Nicrophorus*). *Annales Zoologici Fennici*, 25(2), 191-201.
- 497 Pagh, S., Tjørnløv, R. S., Olesen, C. R., & Chriel, M. (2015). The diet of Danish red foxes  
498 (*Vulpes vulpes*) in relation to a changing agricultural ecosystem. A historical perspective.  
499 *Mammal Research*, 60(4), 319-329. doi:10.1007/s13364-015-0244-y
- 500 Potticary, A. L., Cunningham, C. B., & Moore, A. J. (in review). Flexible parenting ensures  
501 robustness of postembryonic development.  
502 doi:<https://doi.org/10.1101/2022.12.13.520305>
- 503 Psarev, A., Ereemeev, E., & Zinchenko, V. (2020). *Materials for the study of entomofauna of*  
504 *protected areas of Altai Krai: Ikonnikov Island*. Paper presented at the IOP Conference  
505 Series: Earth and Environmental Science.
- 506 Pukowski, E. (1933). Ökologische Untersuchungen an *Necrophorus* *Zeitschrift für Morphologie*  
507 *und Ökologie der Tiere*, 27, 518-586.
- 508 Richardson, J., Stephens, J., & Smiseth, P. T. (2020). Increased allocation to reproduction  
509 reduces future competitive ability in a burying beetle. *Journal of Animal Ecology*, 89(8),  
510 1918-1926. doi:<https://doi.org/10.1111/1365-2656.13242>
- 511 Robertson, I. C. (1993). Nest intrusions, infanticide, and parental care in the burying beetle,  
512 *Nicrophorus orbicollis* (Coleoptera: Silphidae). *Journal of Zoology*, 231(4), 583-593.  
513 doi:<https://doi.org/10.1111/j.1469-7998.1993.tb01940.x>
- 514 Rodriguez, W. C., & Bass, W. M. (1983). Insect activity and its relationship to decay rates of  
515 human cadavers in east Tennessee. *Journal of Forensic Sciences*, 28, 423-432.  
516 doi:10.1520/JFS11524J

- 517 Schrempf, S. D., Burke, K. W., Wettlaufer, J. D., & Martin, P. R. (2021). Behavioral dominance  
518 interactions between *Nicrophorus orbicollis* and *N. tomentosus* burying beetles  
519 (Coleoptera: Silphidae). *PeerJ*, 9, e10797. doi:10.7717/peerj.10797
- 520 Scott, M. (1990). Brood guarding and the evolution of male parental care in burying beetles.  
521 *Behavioral Ecology and Sociobiology*, 26(1), 31-39.  
522 doi:<https://doi.org/10.1007/BF00174022>
- 523 Scott, M. (1998). The ecology and behavior of burying beetles. *Annual Review of Entomology*,  
524 43, 595-618. doi:10.1146/annurev.ento.43.1.595
- 525 Scott, M., & Traniello, J. (1990). Behavioural and ecological correlates of male and female  
526 parental care and reproductive success in burying beetles (*Nicrophorus* spp.). *Animal*  
527 *Behaviour*, 39(2), 274-283. doi:[https://doi.org/10.1016/S0003-3472\(05\)80871-1](https://doi.org/10.1016/S0003-3472(05)80871-1)
- 528 Shubeck, P. P. (1983). Habitat preferences of carrion beetles in the Great Swamp National  
529 Wildlife Refuge, New Jersey (Coleoptera: Silphidae, Dermestidae, Nitidulidae,  
530 Histeridae, Scarabaeidae). *Journal of the New York Entomological Society*, 91(4), 333-  
531 341.
- 532 Sikes, D. S. (1996). The natural history of *Nicrophorus nigrita*, a western Nearctic species  
533 (Coleoptera: Silphidae). *Pan Pacific Entomologist*, 72(2), 70-81.
- 534 Stearns, S. C. (1989). Trade-offs in life-history evolution. *Functional ecology*, 3, 259-268.  
535 doi:<https://doi.org/10.2307/2389364>
- 536 Suzuki, S., & Nagano, M. (2006). Resource guarding by *Ptomascopus morio*: simple parental  
537 care in the Nicrophorinae (Coleoptera: Silphidae). *European Journal of Entomology*,  
538 103(1), 245. doi:10.14411/eje.2006.027
- 539 Tallamy, D. W. (1984). Insect Parental Care. *BioSci.*, 34(1), 20-24. doi:10.2307/1309421

- 540 Trumbo, S. T. (1990). Reproductive success, phenology and biogeography of burying beetles  
541 (Silphidae, *Nicrophorus*). *The American Midland Naturalist*, 124(1), 1-11.  
542 doi:10.2307/2426074
- 543 Trumbo, S. T. (2022). Why do males stay in biparental burying beetles? *Behaviour*, 159(13-14),  
544 1301-1318. doi:<https://doi.org/10.1163/1568539X-bja10182>
- 545 Trumbo, S. T., & Sikes, D. S. (2021). Resource concealment and the evolution of parental care  
546 in burying beetles. *Journal of Zoology*, 315(3), 175-182.  
547 doi:<https://doi.org/10.1111/jzo.12916>
- 548 Ulyshen, M. D., & Hanula, J. L. (2003). Diversity and seasonal activity of carrion beetles  
549 (Coleoptera:Silphidae) in northeastern Georgia. *Journal of Entomological Science*, 39(3),  
550 460-463. doi:<https://doi.org/10.18474/0749-8004-39.3.460>
- 551 von Hoermann, C., Steiger, S., Müller, J. K., & Ayasse, M. (2013). Too fresh is unattractive! The  
552 attraction of newly emerged *Nicrophorus vespilloides* females to odour bouquets of large  
553 cadavers at various stages of decomposition. *PLoS One*, 8(3), e58524.  
554 doi:10.1371/journal.pone.0058524
- 555 Wilson, D. S., & Knollenberg, W. G. (1984). Food discrimination and ovarian development in  
556 burying beetles (Coleoptera: Silphidae: *Nicrophorus*). *Annals of the Entomological*  
557 *Society of America*, 77(2), 165-170. doi:10.1093/aesa/77.2.165
- 558 Wilson, D. S., Knollenberg, W. G., & Fudge, J. (1984). Species packing and temperature  
559 dependent competition among burying beetles (Silphidae, *Nicrophorus*). *Ecological*  
560 *Entomology*, 9(2), 205-216. doi: <https://doi.org/10.1111/j.1365-2311.1984.tb00716.x>
- 561 Wilson, E. O. (1975). *Sociobiology: the New Synthesis*. Cambridge: Harvard University Press.  
562



563 **Figures and Tables**

564

565 **Table 1. Species captured in carrion traps across *N. orbicollis* active season.** Species for  
566 which at least ten were captured in carrion traps. Where possible, individuals were identified to  
567 species, although several were only identified to genus or family. For *Nicrophorus* species,  
568 individuals were also identified to sex, as described below the total capture numbers. Capture  
569 dates reflect the first and last dates individuals were captured for each.

570

571 **Figure 1. Range of *N. orbicollis* and location of study sites.** Map derived from verified  
572 iNaturalist sightings indicating the general range of *N. orbicollis* (light orange overlay). Inset  
573 indicates relative location of study area within the *N. orbicollis* range and distribution of trap  
574 lines (white circles) within Whitehall Forest. Scale bar indicates 150 meters.

575

576 **Figure 2. Activity of *N. orbicollis* relative to environmental context.** (A) Number of *N.*  
577 *orbicollis* captured per trap day across the active season (orange line). Orange arrows indicate  
578 dates when the first or last *N. orbicollis* were captured for the season. Gray y-axis indicates mean  
579 ambient temperature (gray circle and error bars) from nearby weather station. (B) Number of  
580 each species per trap day for the three most abundant interspecific competitors (*Oiceoptoma*  
581 *inaequale*, *Necrophila americana*, and Histeridae spp.) for carrion relative to *N. orbicollis*  
582 captures. X-axis the same for both 2A and 2B. (C) Temperature at soil surface (gray line and gray  
583 circles) and 12 cm underground (black line and black circles) in study area. Note that  
584 temperature data from the study area is only available for October 14 – November 22, 2022.  
585 Error bars  $\pm$  SD.

586

587 **Figure 3. *Nicrophorus* active season has extended over twenty years.** (A) *N. orbicollis* total  
588 captures at Whitehall Forest for 2002 (dashed black line) and 2022 (solid orange line). Black  
589 arrows indicate dates that *N. orbicollis* were first or last captured in 2002, while orange arrows  
590 indicate dates that *N. orbicollis* were first or last captured in 2022. (B) *N. tomentosus* total  
591 captures at Whitehall Forest for 2002 (dotted black line) and 2022 (solid red line). Black arrows  
592 indicate dates that *N. tomentosus* were first or last captured in 2002, while red arrows indicate  
593 dates that *N. tomentosus* were first or last captured in 2022. Note that scaling of y-axes for A and  
594 B differ. All 2002 data were acquired from (Ulyshen & Hanula, 2003).

595

596 **Figure 4. *N. orbicollis* active season longer in more southern areas.** Weekly total *N. orbicollis*  
597 captures at Whitehall Forest, GA (solid orange line), in Kentucky (solid black line), and Ontario  
598 (dotted black line). Orange arrows indicate first and last *N. orbicollis* captures in Georgia, while  
599 solid black and dotted arrows indicate the same information for Kentucky (DeMoss, 1968) and  
600 Ontario (Anderson, 1982), respectively.

601

602 **Figure 5. Variation in pronotum size of *Nicrophorus* at Whitehall Forest.** Pronotum width of  
603 female and male *N. orbicollis* and *N. tomentosus*. While female (white violin) and male (grey  
604 violin) *N. orbicollis* do not differ in size, as measured by pronotum width, *N. orbicollis* is larger  
605 than *N. tomentosus*, and *N. tomentosus* females are larger than *N. tomentosus* males. Asterisks  
606 indicate a statistically significant difference between groups ( $P < 0.05$ ).

607

608

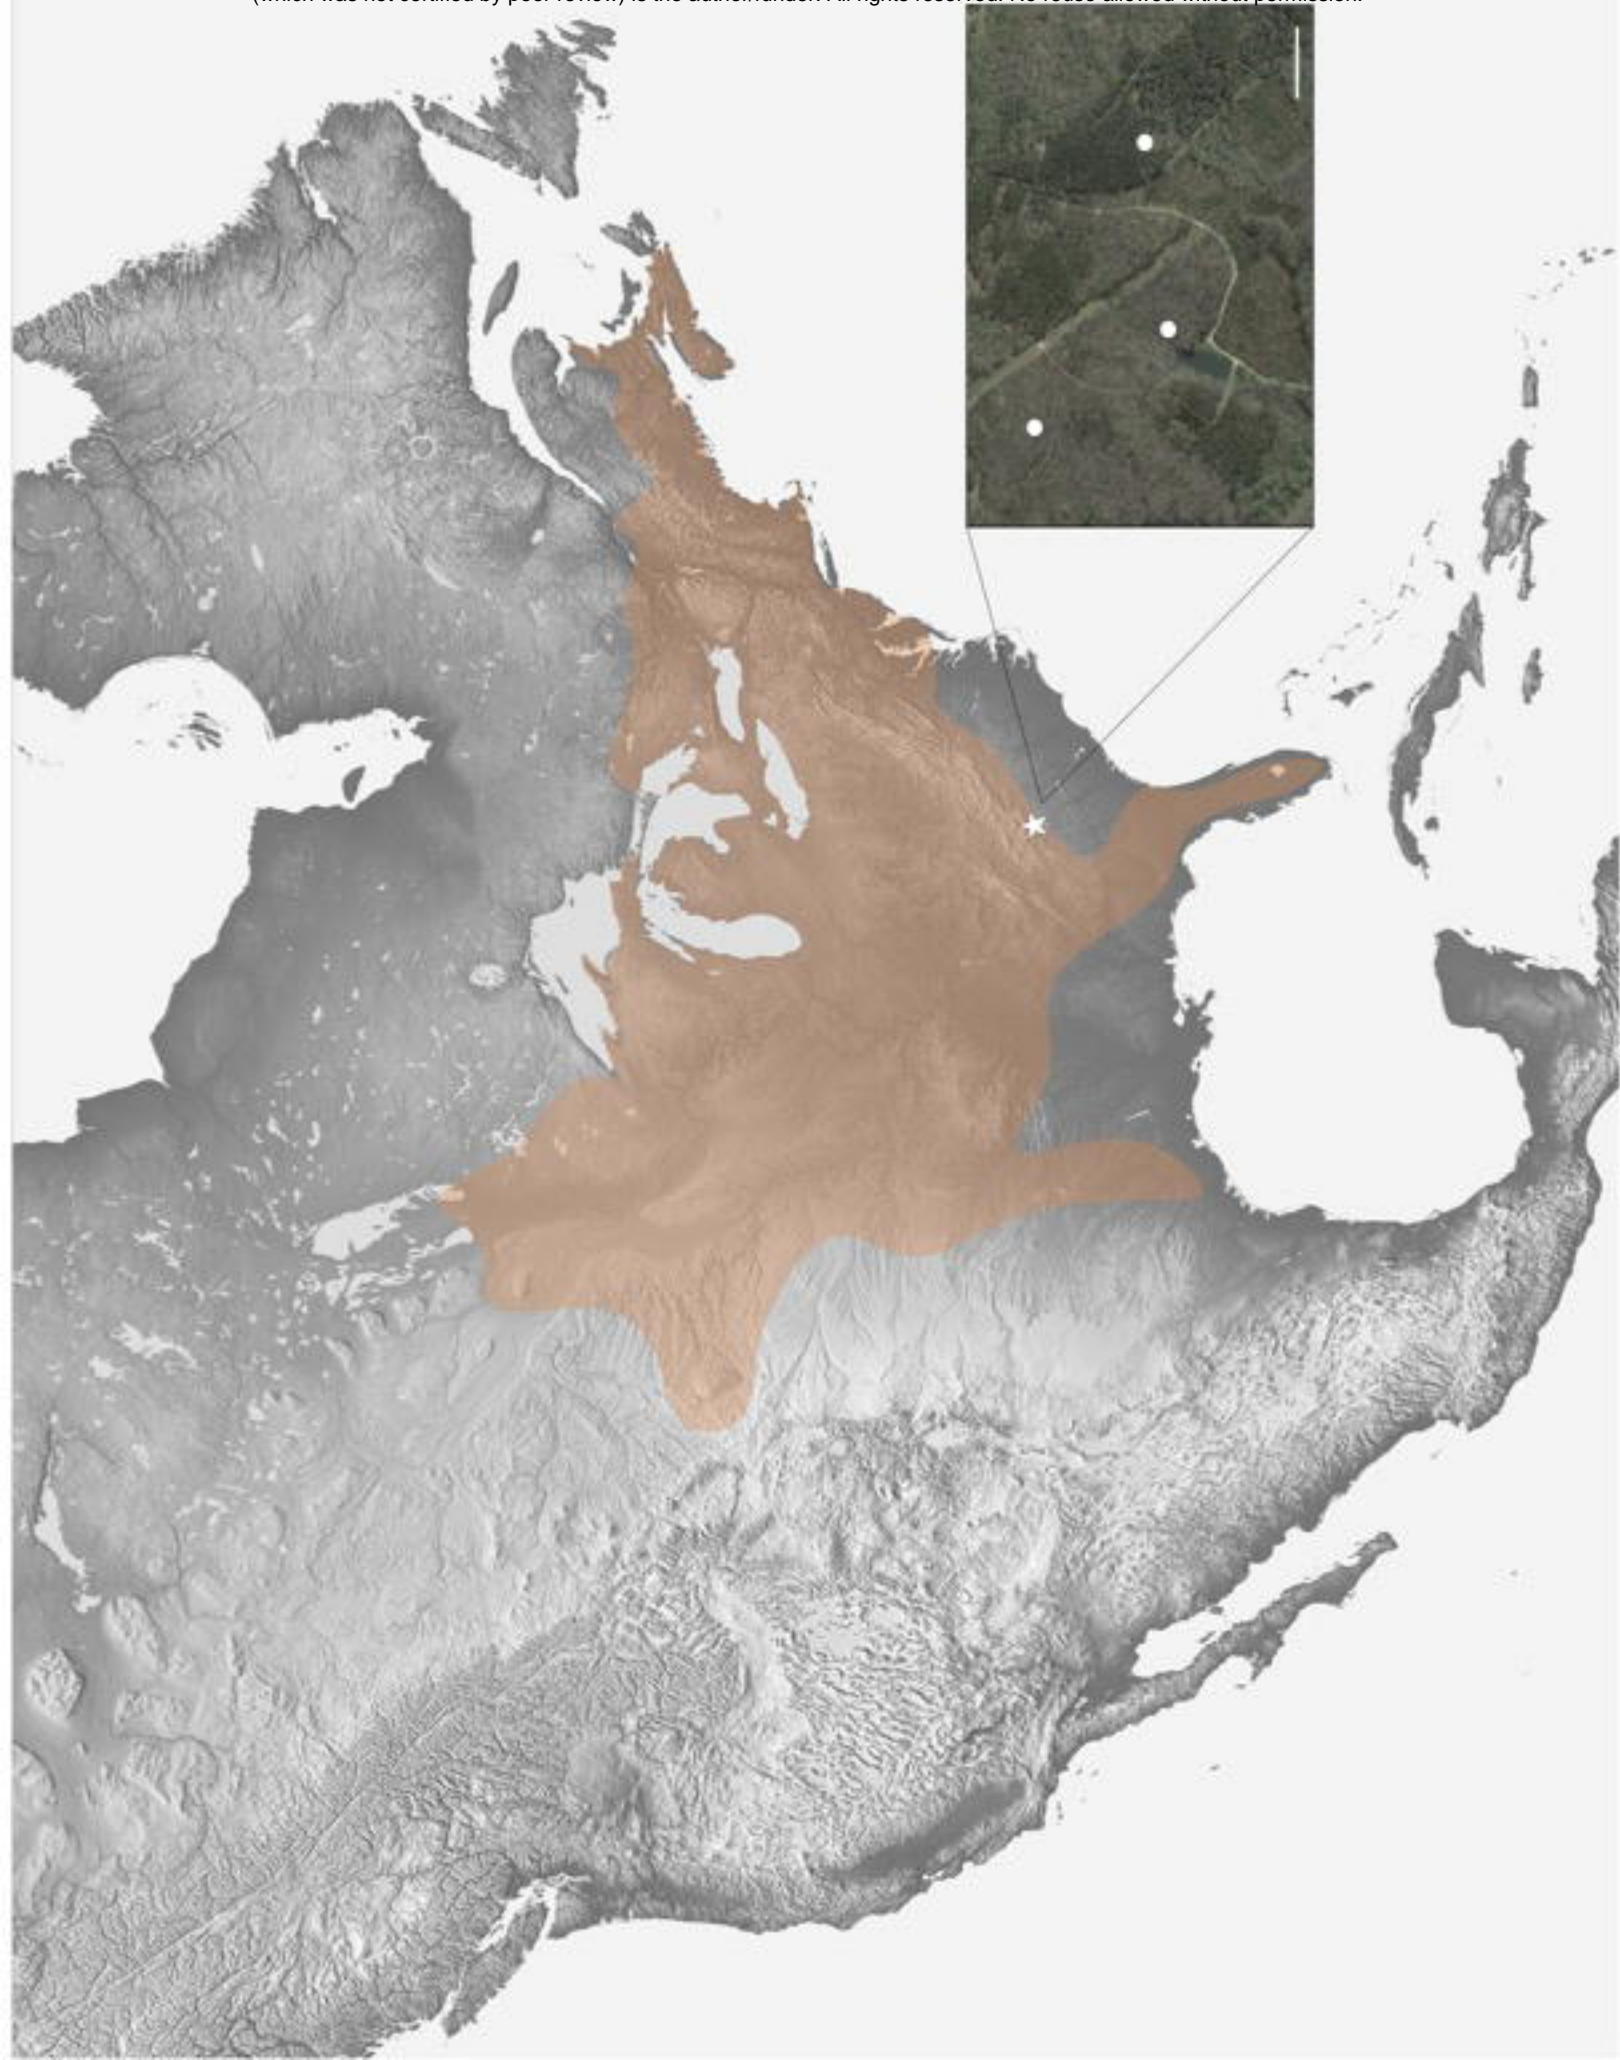

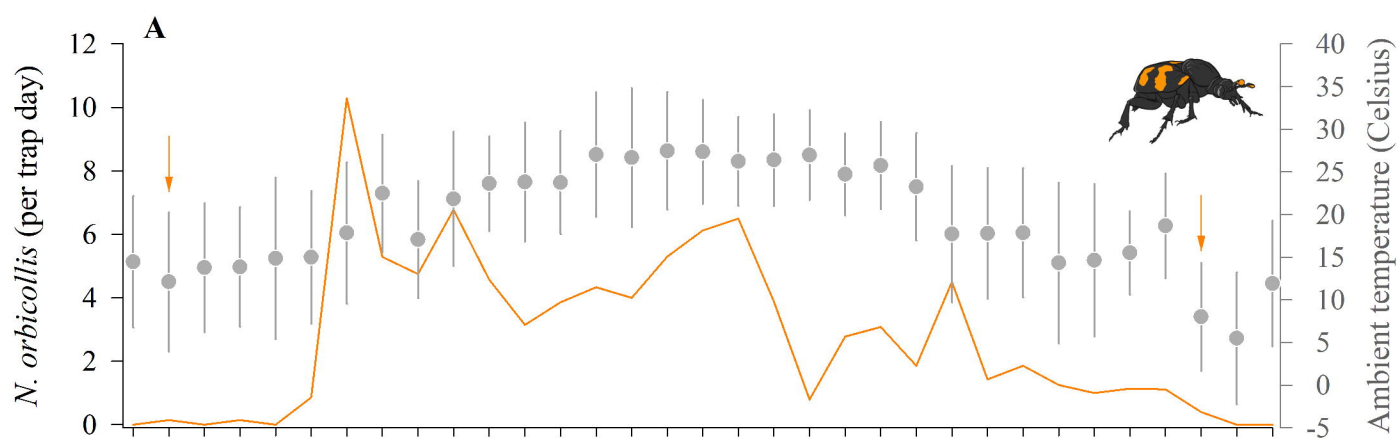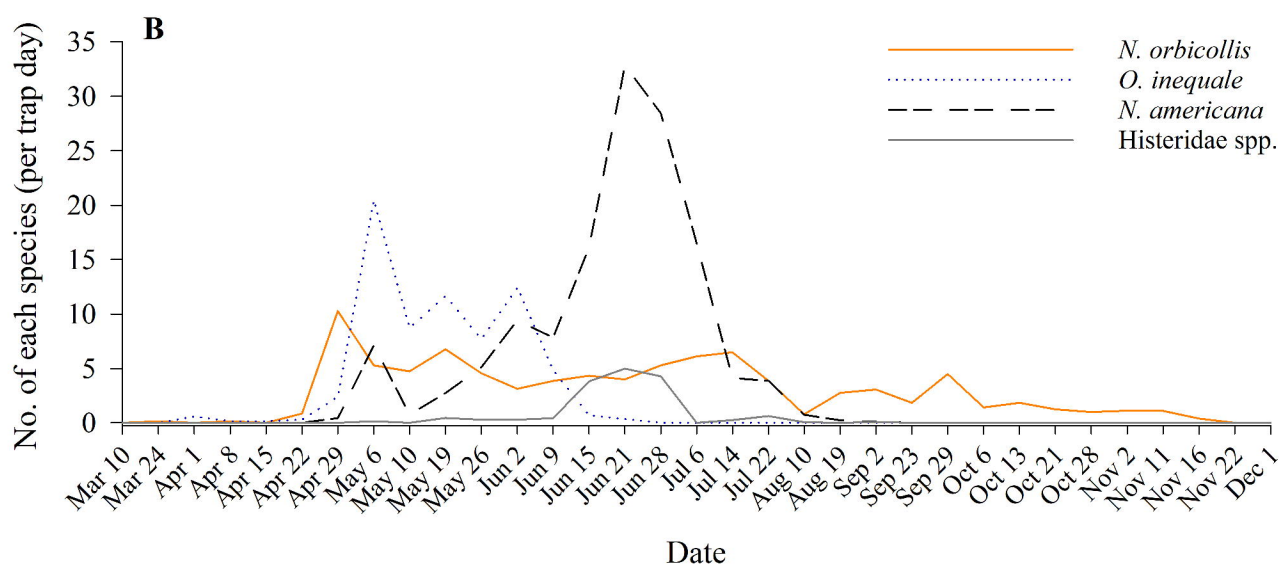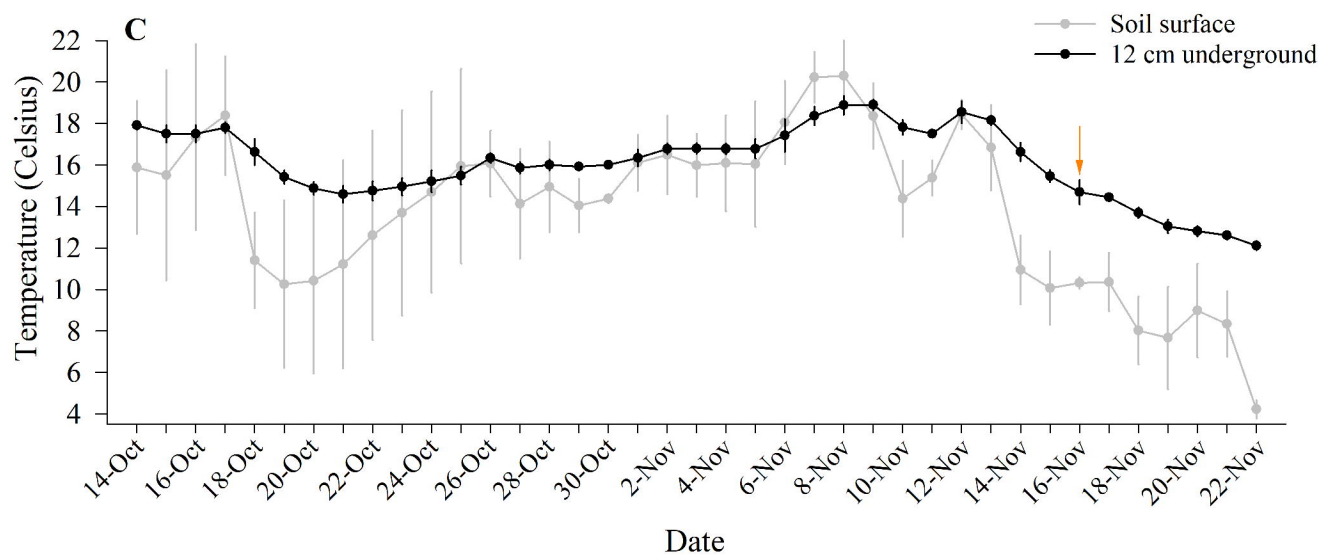

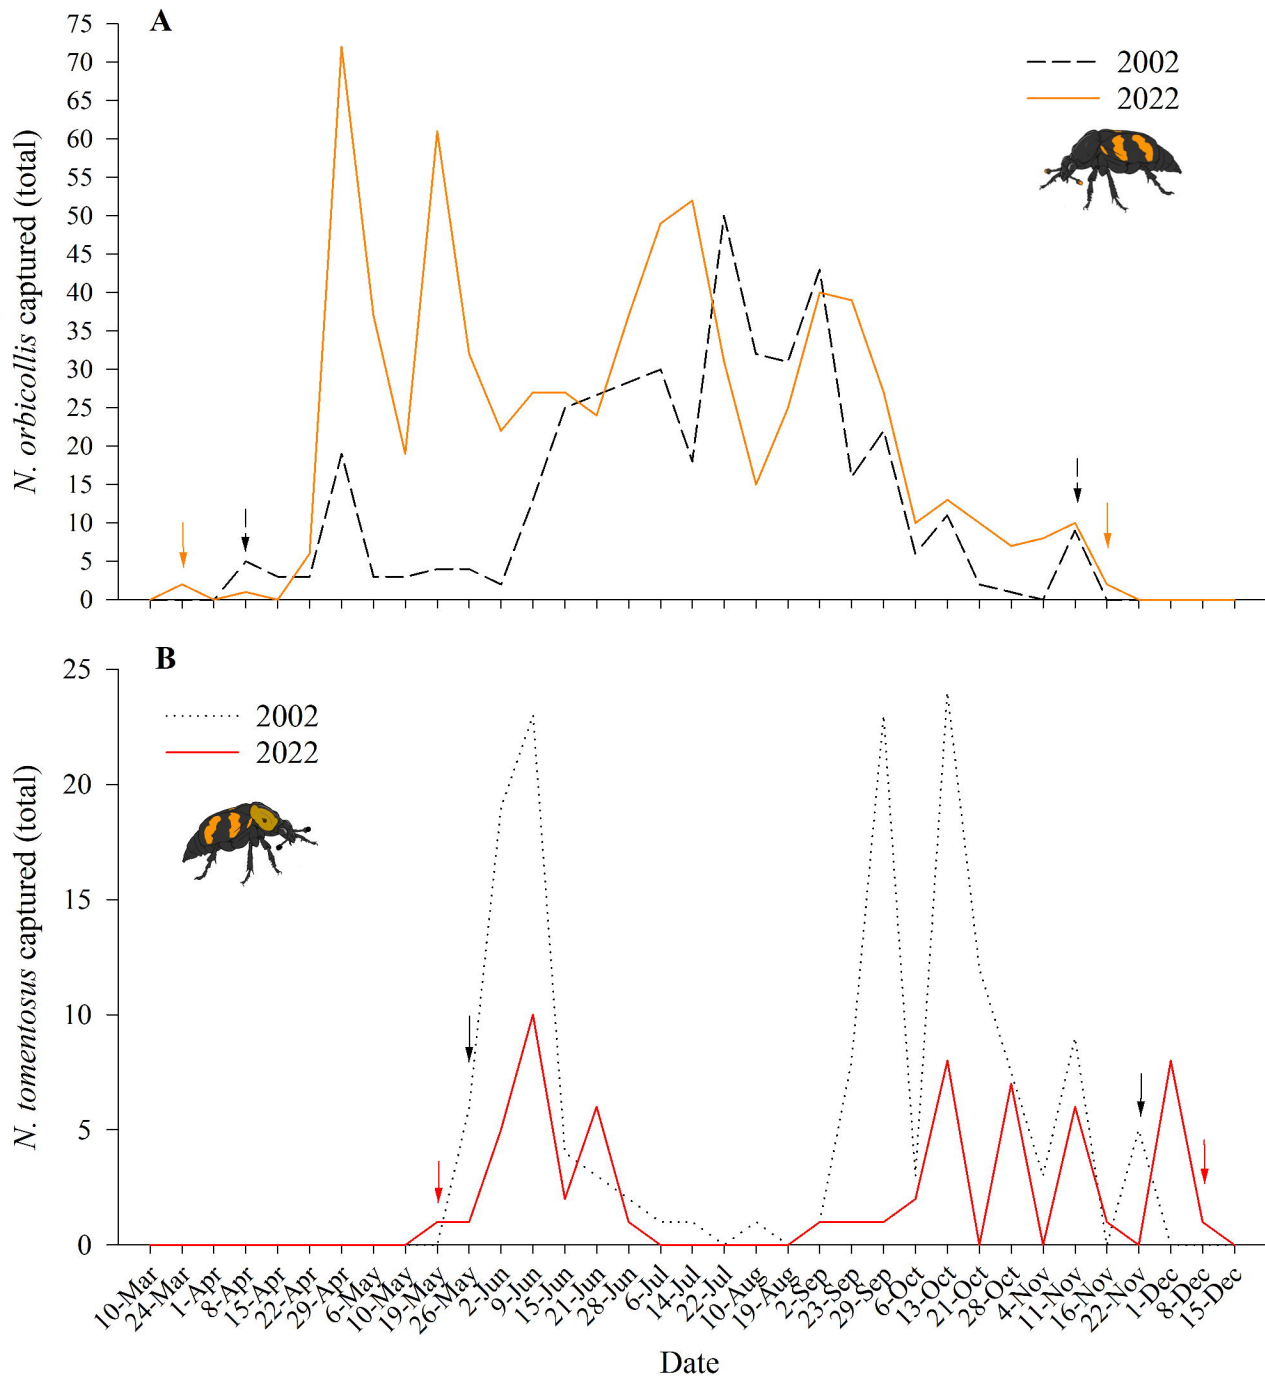

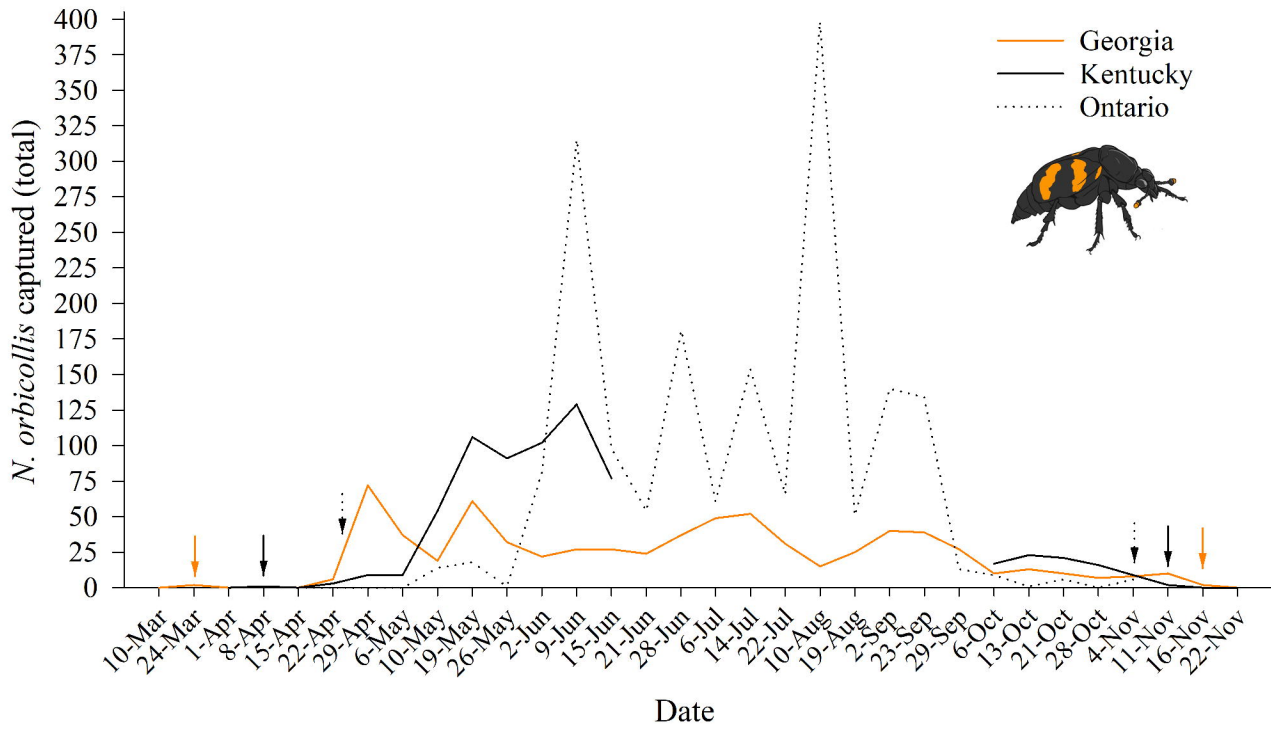

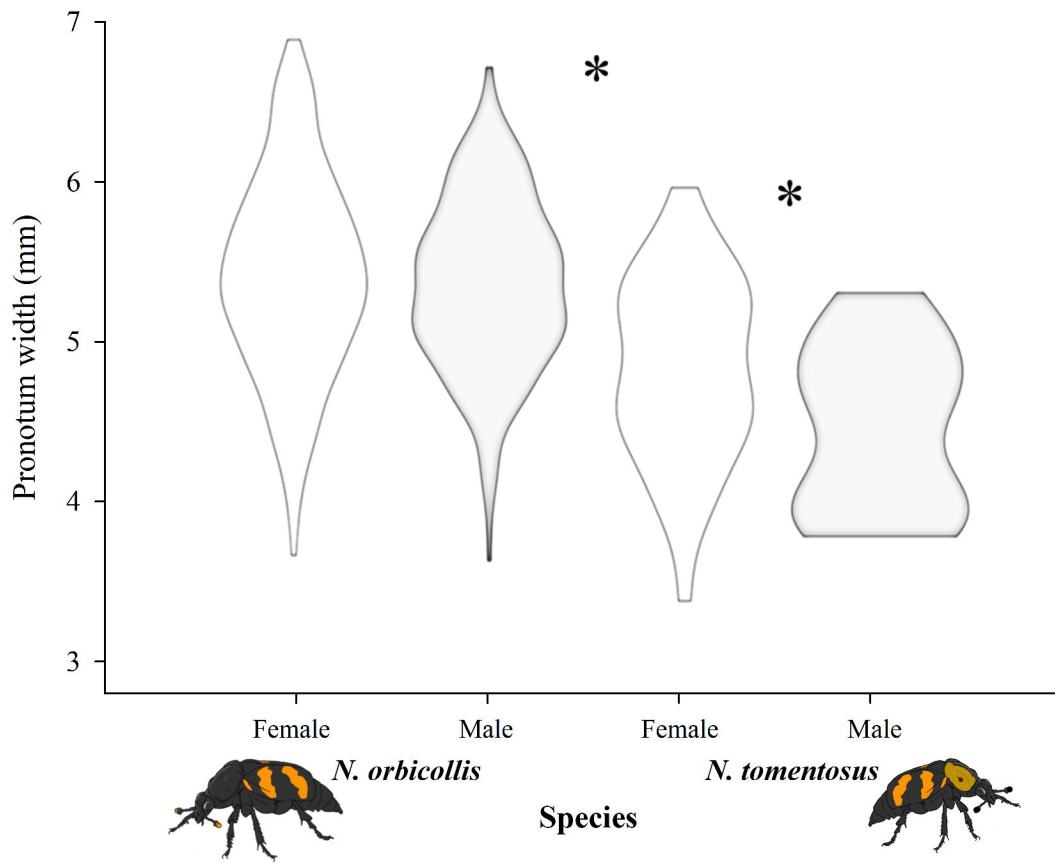

Source: https://biorxiv.org/content/10.1101/2022.12.20.521241v1.full.pdf
